# Supplementary material for: The bed nucleus of the stria terminalis in threat detection: task choice and rodent experience
Source: PubMed Central journal article supplement (PMC9788396; doi:10.1042/etls20220002), 2022-11-23

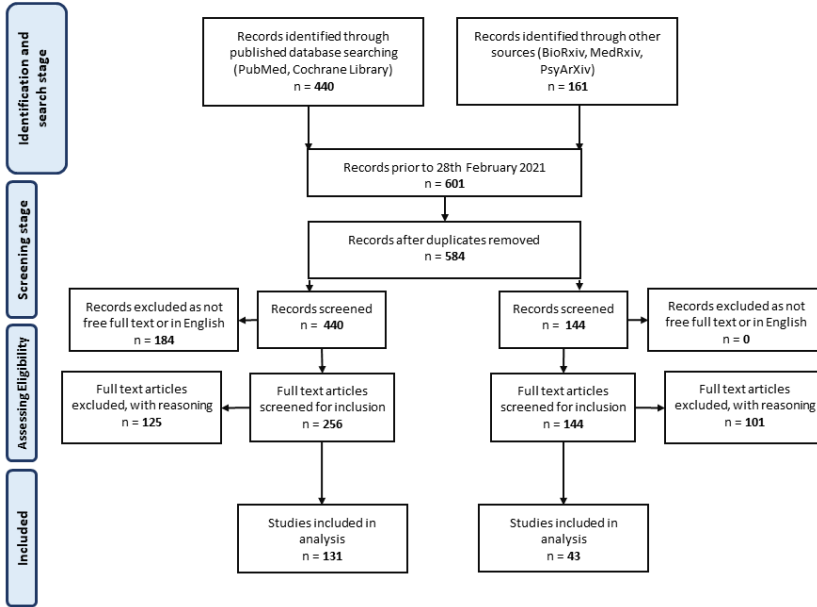

Supplement: ETLS-6-457-s1.pdf [file ETLS-6-457-s1.pdf]
